# Supplementary material
Source: publisher figshare collection journal article supplement (https://gsapubs.figshare.com/ndownloader/files/33890870)
Supplement: Supplementary file 1 [file 33890870]

## Sheet: Gravi_Theo_filtred
Gravity measurements along the COSC Composite Seismic Profile (Jämtland county, Sweden)
Latitude	Longitude	Bouguer gravity anomaly (mGal)	Error (mGal)	Elevation (m)
63.1852	13.9521	-87.5713	0.1438	373.862
63.2027	13.9342	-85.3040	0.1437	341.244
63.1954	13.9444	-86.4750	0.1432	351.466
63.3486	13.4552	-82.3458	0.1423	331.710
63.4116	13.2342	-75.4915	0.1430	596.560
63.4353	13.2113	-76.1130	0.1425	477.531
63.4465	13.2254	-76.5913	0.1424	395.929
63.4243	13.2169	-75.5500	0.1425	542.511
63.2896	13.6448	-81.9729	0.1469	339.936
63.2720	13.6431	-81.5860	0.1481	404.892
63.2576	13.6522	-81.9206	0.1495	434.544
63.2449	13.6662	-82.0562	0.1471	425.760
63.2355	13.6748	-82.0602	0.1491	421.451
63.2371	13.6956	-82.8655	0.1507	396.235
63.2445	13.7200	-82.9861	0.1486	395.667
63.2470	13.7407	-84.0007	0.1465	381.583
63.2557	13.7722	-84.9648	0.1507	318.285
63.2638	13.7869	-85.3984	0.1487	310.630
63.2590	13.8145	-85.8084	0.1466	312.447
63.2500	13.8332	-86.1738	0.1469	314.176
63.2695	13.7634	-84.5607	0.1494	311.083
63.2788	13.7319	-83.7463	0.1469	308.070
63.2980	13.6916	-83.2212	0.1476	306.850
63.2897	13.6329	-82.0193	0.1690	324.528
63.2893	13.6146	-81.3735	0.1696	333.489
63.2924	13.5921	-81.5383	0.1756	320.720
63.2962	13.5737	-80.8053	0.1668	323.430
63.3008	13.5562	-80.0603	0.1711	324.845
63.3063	13.5388	-79.8365	0.1635	331.107
63.3123	13.5260	-80.1655	0.1704	319.201
63.3175	13.5089	-81.0149	0.1615	328.737
63.3226	13.4898	-80.6140	0.1586	322.432
63.3225	13.4703	-80.9878	0.1695	320.892
63.3196	13.4503	-80.4288	0.1633	329.993
63.3234	13.4812	-80.7559	0.1628	320.574
63.3202	13.4982	-80.4531	0.1564	320.972
63.3152	13.5182	-80.0672	0.1569	324.012
63.3098	13.5326	-79.7858	0.1549	318.480
63.3037	13.5475	-80.1139	0.1557	318.464
63.2978	13.5667	-80.5995	0.1573	331.109
63.2943	13.5843	-81.3810	0.1522	321.544
63.2907	13.6016	-81.1015	0.1527	321.695
63.2904	13.6231	-81.3926	0.1543	323.291
63.4013	13.2031	-75.3434	0.1529	520.740
63.3972	13.2291	-75.2480	0.1537	545.017
63.3275	13.3861	-83.3936	0.1517	365.556
63.3203	13.4302	-82.0834	0.1514	322.602
63.3278	13.4108	-83.1468	0.1511	318.519
63.3673	13.2607	-78.7705	0.1467	440.832
63.3615	13.2654	-79.0870	0.1471	447.685
63.3600	13.2734	-79.6929	0.1444	454.927
63.3576	13.2841	-80.0999	0.1453	465.906
63.3554	13.2940	-80.9747	0.1447	465.585
63.3533	13.3020	-81.6720	0.1442	462.786
63.3520	13.3116	-82.0676	0.1437	477.307
63.3496	13.3212	-82.2119	0.1466	468.829
63.3461	13.3271	-82.3407	0.1443	461.917
63.3286	13.3680	-82.8374	0.1439	347.819
